# Supplementary material for: The Association of Post-Concussion and Post-Traumatic Stress Disorder Symptoms with Health-Related Quality of Life, Health Care Use and Return-to-Work after Mild Traumatic Brain Injury
Source: MDPI journal article supplement (doi:10.3390/jcm10112473), 2021-06-02
Supplement: s1 [file s1]

### **The CENTER-TBI participants and investigators:**

Cecilia Åkerlund<sup>1</sup>, Krisztina Amrein<sup>2</sup>, Nada Andelic<sup>3</sup>, Lasse Andreassen<sup>4</sup>, Audny Anke<sup>5</sup>, Anna Antoni<sup>6</sup>, Gérard Audibert<sup>7</sup>, Philippe Azouvi<sup>8</sup>, Maria Luisa Azzolini<sup>9</sup>, Ronald Bartels<sup>10</sup>, Pál Barzó<sup>11</sup>, Romuald Beauvais<sup>12</sup>, Ronny Beer<sup>13</sup>, Bo-Michael Bellander<sup>14</sup>, Antonio Belli<sup>15</sup>, Habib Benali<sup>16</sup>, Maurizio Berardino<sup>17</sup>, Luigi Beretta<sup>9</sup>, Morten Blaabjerg<sup>18</sup>, Peter Bragge<sup>19</sup>, Alexandra Brazinova<sup>20</sup>, Vibeke Brinck<sup>21</sup>, Joanne Brooker<sup>22</sup>, Camilla Brorsson<sup>23</sup>, Andras Buki<sup>24</sup>, Monika Bullinger<sup>25</sup>, Manuel Cabeleira<sup>26</sup>, Alessio Caccioppola<sup>27</sup>, Emiliana Calappi<sup>27</sup>, Maria Rosa Calvi<sup>9</sup>, Peter Cameron<sup>28</sup>, Guillermo Carbayo Lozano<sup>29</sup>, Marco Carbonara<sup>27</sup>, Simona Cavallo<sup>17</sup>, Giorgio Chevallard<sup>30</sup>, Arturo Chieragato<sup>30</sup>, Giuseppe Citerio<sup>31, 32</sup>, Hans Clusmann<sup>33</sup>, Mark Coburn<sup>34</sup>, Jonathan Coles<sup>35</sup>, Jamie D. Cooper<sup>36</sup>, Marta Correia<sup>37</sup>, Amra Čović<sup>38</sup>, Nicola Curry<sup>39</sup>, Endre Czeiter<sup>24</sup>, Marek Czosnyka<sup>26</sup>, Claire Dahyot-Fizelier<sup>40</sup>, Paul Dark<sup>41</sup>, Helen Dawes<sup>42</sup>, Véronique De Keyser<sup>43</sup>, Vincent Degos<sup>16</sup>, Francesco Della Corte<sup>44</sup>, Hugo den Boogert<sup>10</sup>, Bart Depreitere<sup>45</sup>, Đula Đilvesi<sup>46</sup>, Abhishek Dixit<sup>47</sup>, Emma Donoghue<sup>22</sup>, Jens Dreier<sup>48</sup>, Guy-Loup Dulière<sup>49</sup>, Ari Ercole<sup>47</sup>, Patrick Esser<sup>42</sup>, Erzsébet Ezer<sup>50</sup>, Martin Fabricius<sup>51</sup>, Valery L. Feigin<sup>52</sup>, Kelly Foks<sup>53</sup>, Shirin Frisvold<sup>54</sup>, Alex Furmanov<sup>55</sup>, Pablo Gagliardo<sup>56</sup>, Damien Galanaud<sup>16</sup>, Dashiell Gantner<sup>28</sup>, Guoyi Gao<sup>57</sup>, Pradeep George<sup>58</sup>, Alexandre Ghuysen<sup>59</sup>, Lelde Giga<sup>60</sup>, Ben Glocker<sup>61</sup>, Jagoš Golubovic<sup>46</sup>, Pedro A. Gomez<sup>62</sup>, Johannes Gratz<sup>63</sup>, Benjamin Gravesteijn<sup>64</sup>, Francesca Grossi<sup>44</sup>, Russell L. Gruen<sup>65</sup>, Deepak Gupta<sup>66</sup>, Juanita A. Haagsma<sup>64</sup>, Iain Haitsma<sup>67</sup>, Raimund Helbok<sup>13</sup>, Eirik Helseth<sup>68</sup>, Lindsay Horton<sup>69</sup>, Jilske Huijben<sup>64</sup>, Peter J. Hutchinson<sup>70</sup>, Bram Jacobs<sup>71</sup>, Stefan Jankowski<sup>72</sup>, Mike Jarrett<sup>21</sup>, Ji-yao Jiang<sup>58</sup>, Faye Johnson<sup>73</sup>, Kelly Jones<sup>52</sup>, Mladen Karan<sup>46</sup>, Angelos G. Kolias<sup>70</sup>, Erwin Kompanje<sup>74</sup>, Daniel Kondziella<sup>51</sup>, Evgenios Kornaropoulos<sup>47</sup>, Lars-Owe Koskinen<sup>75</sup>, Noémi Kovács<sup>76</sup>, Ana Kowark<sup>77</sup>, Alfonso Lagares<sup>62</sup>, Linda Lanyon<sup>58</sup>, Steven Laureys<sup>78</sup>, Fiona Lecky<sup>79, 80</sup>, Didier Ledoux<sup>78</sup>, Rolf Lefering<sup>81</sup>, Valerie Legrand<sup>82</sup>, Aurelie Lejeune<sup>83</sup>, Leon Levi<sup>84</sup>, Roger Lightfoot<sup>85</sup>, Hester Lingsma<sup>64</sup>, Andrew I.R. Maas<sup>43</sup>, Ana M. Castaño-León<sup>62</sup>, Marc Maegele<sup>86</sup>, Marek Majdan<sup>20</sup>, Alex Manara<sup>87</sup>, Geoffrey Manley<sup>88</sup>, Costanza Martino<sup>89</sup>, Hugues Maréchal<sup>49</sup>, Julia Mattern<sup>90</sup>, Catherine McMahon<sup>91</sup>, Béla Meleghe<sup>92</sup>, David Menon<sup>47</sup>, Tomas Menovsky<sup>43</sup>, Ana Mikolic<sup>64</sup>, Benoit Misset<sup>78</sup>, Visakh Muraleedharan<sup>58</sup>, Lynnette Murray<sup>28</sup>, Ancuta Negru<sup>93</sup>, David Nelson<sup>1</sup>, Virginia Newcombe<sup>47</sup>, Daan Nieboer<sup>64</sup>, József Nyirádi<sup>2</sup>, Otesile Olubukola<sup>79</sup>, Matej Oresic<sup>94</sup>, Fabrizio Ortolano<sup>27</sup>, Aarno Palotie<sup>95, 96, 97</sup>, Paul M. Parizel<sup>98</sup>, Jean-François Payen<sup>99</sup>, Natascha Perera<sup>12</sup>, Vincent Perlbarg<sup>16</sup>, Paolo Persona<sup>100</sup>, Wilco Peul<sup>101</sup>, Anna Piippo-Karjalainen<sup>102</sup>, Matti Pirinen<sup>95</sup>, Horia Ples<sup>93</sup>, Suzanne Polinder<sup>64</sup>, Inigo Pomposo<sup>29</sup>, Jussi P. Posti<sup>103</sup>, Louis Puybasset<sup>104</sup>, Andreea Radoi<sup>105</sup>, Arminas Ragauskas<sup>106</sup>, Rahul Raj<sup>102</sup>, Malinka Rambadagalla<sup>107</sup>, Jonathan Rhodes<sup>108</sup>, Sylvia Richardson<sup>109</sup>, Sophie Richter<sup>47</sup>, Samuli Ripatti<sup>95</sup>, Saulius Rocka<sup>106</sup>, Cecilie Roe<sup>110</sup>, Olav Roise<sup>111, 112</sup>, Jonathan Rosand<sup>113</sup>, Jeffrey V. Rosenfeld<sup>114</sup>, Christina Rosenlund<sup>115</sup>, Guy Rosenthal<sup>55</sup>, Rolf Rossaint<sup>77</sup>, Sandra Rossi<sup>100</sup>, Daniel Rueckert<sup>61</sup>, Martin Rusnák<sup>116</sup>, Juan Sahuquillo<sup>105</sup>, Oliver Sakowitz<sup>90, 117</sup>, Renan Sanchez-Porras<sup>117</sup>, Janos Sandor<sup>118</sup>, Nadine Schäfer<sup>81</sup>, Silke Schmidt<sup>119</sup>, Herbert Schoechl<sup>120</sup>, Guus Schoonman<sup>121</sup>, Rico Frederik Schou<sup>122</sup>, Elisabeth Schwendenwein<sup>6</sup>, Charlie Sewalt<sup>64</sup>, Toril Skandsen<sup>123, 124</sup>, Peter Smielewski<sup>26</sup>, Abayomi Sorinola<sup>125</sup>, Emmanuel Stamatakis<sup>47</sup>, Simon Stanworth<sup>39</sup>, Robert Stevens<sup>126</sup>, William Stewart<sup>127</sup>, Ewout W. Steyerberg<sup>64, 128</sup>, Nino Stocchetti<sup>129</sup>,

Nina Sundström<sup>130</sup>, Riikka Takala<sup>131</sup>, Viktória Tamás<sup>125</sup>, Tomas Tamosuitis<sup>132</sup>,  
Mark Steven Taylor<sup>20</sup>, Braden Te Ao<sup>52</sup>, Olli Tenovuo<sup>103</sup>, Alice Theadom<sup>52</sup>, Matt Thomas<sup>87</sup>,  
Dick Tibboel<sup>133</sup>, Marjolein Timmers<sup>74</sup>, Christos Tolia<sup>134</sup>, Tony Trapani<sup>28</sup>, Cristina Maria Tudora<sup>93</sup>,  
Andreas Unterberg<sup>90</sup>, Peter Vajkoczy<sup>135</sup>, Shirley Vallance<sup>28</sup>, Egils Valeinis<sup>60</sup>, Zoltán Vámos<sup>50</sup>,  
Mathieu van der Jagt<sup>136</sup>, Gregory Van der Steen<sup>43</sup>, Joukje van der Naalt<sup>71</sup>, Jeroen T.J.M. van Dijk<sup>101</sup>,  
Thomas A. van Essen<sup>101</sup>, Wim Van Hecke<sup>137</sup>, Caroline van Heugten<sup>138</sup>,  
Dominique Van Praag<sup>139</sup>, Thijs Vande Vyvere<sup>137</sup>, Roel P. J. van Wijk<sup>101</sup>, Alessia Vargiolu<sup>32</sup>,  
Emmanuel Vega<sup>83</sup>, Kimberley Velt<sup>64</sup>, Jan Verheyden<sup>137</sup>, Paul M. Vespa<sup>140</sup>, Anne Vik<sup>123, 141</sup>,  
Rimantas Vilcinis<sup>132</sup>, Victor Volovici<sup>67</sup>, Nicole von Steinbüchel<sup>38</sup>, Daphne Voormolen<sup>64</sup>,  
Petar Vulekovic<sup>46</sup>, Kevin K.W. Wang<sup>142</sup>, Eveline Wiegers<sup>64</sup>, Guy Williams<sup>47</sup>, Lindsay Wilson<sup>69</sup>,  
Stefan Winzeck<sup>47</sup>, Stefan Wolf<sup>143</sup>, Zhihui Yang<sup>113</sup>, Peter Ylén<sup>144</sup>, Alexander Younsi<sup>90</sup>, Frederick A.  
Zeiler<sup>47,145</sup>, Veronika Zelinkova<sup>20</sup>, Agate Ziverte<sup>60</sup>, Tommaso Zoerle<sup>27</sup>

- <sup>1</sup> Department of Physiology and Pharmacology, Section of Perioperative Medicine and Intensive Care, Karolinska Institutet, Stockholm, Sweden
- <sup>2</sup> János Szentágothai Research Centre, University of Pécs, Pécs, Hungary
- <sup>3</sup> Division of Surgery and Clinical Neuroscience, Department of Physical Medicine and Rehabilitation, Oslo University Hospital and University of Oslo, Oslo, Norway
- <sup>4</sup> Department of Neurosurgery, University Hospital Northern Norway, Tromsø, Norway
- <sup>5</sup> Department of Physical Medicine and Rehabilitation, University Hospital Northern Norway, Tromsø, Norway
- <sup>6</sup> Trauma Surgery, Medical University Vienna, Vienna, Austria
- <sup>7</sup> Department of Anesthesiology & Intensive Care, University Hospital Nancy, Nancy, France
- <sup>8</sup> Raymond Poincaré hospital, Assistance Publique – Hôpitaux de Paris, Paris, France
- <sup>9</sup> Department of Anesthesiology & Intensive Care, S Raffaele University Hospital, Milan, Italy
- <sup>10</sup> Department of Neurosurgery, Radboud University Medical Center, Nijmegen, The Netherlands
- <sup>11</sup> Department of Neurosurgery, University of Szeged, Szeged, Hungary
- <sup>12</sup> International Projects Management, ARTTIC, München, Germany
- <sup>13</sup> Department of Neurology, Neurological Intensive Care Unit, Medical University of Innsbruck, Innsbruck, Austria
- <sup>14</sup> Department of Neurosurgery & Anesthesia & intensive care medicine, Karolinska University Hospital, Stockholm, Sweden
- <sup>15</sup> NIHR Surgical Reconstruction and Microbiology Research Centre, Birmingham, UK
- <sup>16</sup> Anesthésie-Réanimation, Assistance Publique – Hôpitaux de Paris, Paris, France
- <sup>17</sup> Department of Anesthesia & ICU, AOU Città della Salute e della Scienza di Torino - Orthopedic and Trauma Center, Torino, Italy
- <sup>18</sup> Department of Neurology, Odense University Hospital, Odense, Denmark
- <sup>19</sup> BehaviourWorks Australia, Monash Sustainability Institute, Monash University, Victoria, Australia
- <sup>20</sup> Department of Public Health, Faculty of Health Sciences and Social Work, Trnava University, Trnava, Slovakia
- <sup>21</sup> Quesgen Systems Inc., Burlingame, California, USA
- <sup>22</sup> Australian & New Zealand Intensive Care Research Centre, Department of Epidemiology and Preventive Medicine, School of Public Health and Preventive Medicine, Monash University, Melbourne, Australia
- <sup>23</sup> Department of Surgery and Perioperative Science, Umeå University, Umeå, Sweden
- <sup>24</sup> Department of Neurosurgery, Medical School, University of Pécs, Hungary and Neurotrauma Research Group, János Szentágothai Research Centre, University of Pécs, Hungary
- <sup>25</sup> Department of Medical Psychology, Universitätsklinikum Hamburg-Eppendorf, Hamburg, Germany
- <sup>26</sup> Brain Physics Lab, Division of Neurosurgery, Dept of Clinical Neurosciences, University of Cambridge, Addenbrooke's Hospital, Cambridge, UK
- <sup>27</sup> Neuro ICU, Fondazione IRCCS Cà Granda Ospedale Maggiore Policlinico, Milan, Italy
- <sup>28</sup> ANZIC Research Centre, Monash University, Department of Epidemiology and Preventive Medicine, Melbourne, Victoria, Australia
- <sup>29</sup> Department of Neurosurgery, Hospital of Cruces, Bilbao, Spain

- <sup>30</sup> NeuroIntensive Care, Niguarda Hospital, Milan, Italy
- <sup>31</sup> School of Medicine and Surgery, Università Milano Bicocca, Milano, Italy
- <sup>32</sup> NeuroIntensive Care, ASST di Monza, Monza, Italy
- <sup>33</sup> Department of Neurosurgery, Medical Faculty RWTH Aachen University, Aachen, Germany
- <sup>34</sup> Department of Anesthesiology and Intensive Care Medicine, University Hospital Bonn, Bonn, Germany
- <sup>35</sup> Department of Anesthesia & Neurointensive Care, Cambridge University Hospital NHS Foundation Trust, Cambridge, UK
- <sup>36</sup> School of Public Health & PM, Monash University and The Alfred Hospital, Melbourne, Victoria, Australia
- <sup>37</sup> Radiology/MRI department, MRC Cognition and Brain Sciences Unit, Cambridge, UK
- <sup>38</sup> Institute of Medical Psychology and Medical Sociology, Universitätsmedizin Göttingen, Göttingen, Germany
- <sup>39</sup> Oxford University Hospitals NHS Trust, Oxford, UK
- <sup>40</sup> Intensive Care Unit, CHU Poitiers, Poitiers, France
- <sup>41</sup> University of Manchester NIHR Biomedical Research Centre, Critical Care Directorate, Salford Royal Hospital NHS Foundation Trust, Salford, UK
- <sup>42</sup> Movement Science Group, Faculty of Health and Life Sciences, Oxford Brookes University, Oxford, UK
- <sup>43</sup> Department of Neurosurgery, Antwerp University Hospital and University of Antwerp, Edegem, Belgium
- <sup>44</sup> Department of Anesthesia & Intensive Care, Maggiore Della Carità Hospital, Novara, Italy
- <sup>45</sup> Department of Neurosurgery, University Hospitals Leuven, Leuven, Belgium
- <sup>46</sup> Department of Neurosurgery, Clinical centre of Vojvodina, Faculty of Medicine, University of Novi Sad, Novi Sad, Serbia
- <sup>47</sup> Division of Anaesthesia, University of Cambridge, Addenbrooke's Hospital, Cambridge, UK
- <sup>48</sup> Center for Stroke Research Berlin, Charité – Universitätsmedizin Berlin, corporate member of Freie Universität Berlin, Humboldt-Universität zu Berlin, and Berlin Institute of Health, Berlin, Germany
- <sup>49</sup> Intensive Care Unit, CHR Citadelle, Liège, Belgium
- <sup>50</sup> Department of Anaesthesiology and Intensive Therapy, University of Pécs, Pécs, Hungary
- <sup>51</sup> Departments of Neurology, Clinical Neurophysiology and Neuroanesthesiology, Region Hovedstaden Rigshospitalet, Copenhagen, Denmark
- <sup>52</sup> National Institute for Stroke and Applied Neurosciences, Faculty of Health and Environmental Studies, Auckland University of Technology, Auckland, New Zealand
- <sup>53</sup> Department of Neurology, Erasmus MC, Rotterdam, the Netherlands
- <sup>54</sup> Department of Anesthesiology and Intensive care, University Hospital Northern Norway, Tromsø, Norway
- <sup>55</sup> Department of Neurosurgery, Hadassah-hebrew University Medical center, Jerusalem, Israel
- <sup>56</sup> Fundación Instituto Valenciano de Neurorehabilitación (FIVAN), Valencia, Spain
- <sup>57</sup> Department of Neurosurgery, Shanghai Renji hospital, Shanghai Jiaotong University/school of medicine, Shanghai, China
- <sup>58</sup> Karolinska Institutet, INCF International Neuroinformatics Coordinating Facility, Stockholm, Sweden

- <sup>59</sup> Emergency Department, CHU, Liège, Belgium
- <sup>60</sup> Neurosurgery clinic, Pauls Stradins Clinical University Hospital, Riga, Latvia
- <sup>61</sup> Department of Computing, Imperial College London, London, UK
- <sup>62</sup> Department of Neurosurgery, Hospital Universitario 12 de Octubre, Madrid, Spain
- <sup>63</sup> Department of Anesthesia, Critical Care and Pain Medicine, Medical University of Vienna, Austria
- <sup>64</sup> Department of Public Health, Erasmus Medical Center-University Medical Center, Rotterdam, The Netherlands
- <sup>65</sup> College of Health and Medicine, Australian National University, Canberra, Australia
- <sup>66</sup> Department of Neurosurgery, Neurosciences Centre & JPN Apex trauma centre, All India Institute of Medical Sciences, New Delhi-110029, India
- <sup>67</sup> Department of Neurosurgery, Erasmus MC, Rotterdam, the Netherlands
- <sup>68</sup> Department of Neurosurgery, Oslo University Hospital, Oslo, Norway
- <sup>69</sup> Division of Psychology, University of Stirling, Stirling, UK
- <sup>70</sup> Division of Neurosurgery, Department of Clinical Neurosciences, Addenbrooke's Hospital & University of Cambridge, Cambridge, UK
- <sup>71</sup> Department of Neurology, University of Groningen, University Medical Center Groningen, Groningen, Netherlands
- <sup>72</sup> Neurointensive Care , Sheffield Teaching Hospitals NHS Foundation Trust, Sheffield, UK
- <sup>73</sup> Salford Royal Hospital NHS Foundation Trust Acute Research Delivery Team, Salford, UK
- <sup>74</sup> Department of Intensive Care and Department of Ethics and Philosophy of Medicine, Erasmus Medical Center, Rotterdam, The Netherlands
- <sup>75</sup> Department of Clinical Neuroscience, Neurosurgery, Umeå University, Umeå, Sweden
- <sup>76</sup> Hungarian Brain Research Program - Grant No. KTIA\_13\_NAP-A-II/8, University of Pécs, Pécs, Hungary
- <sup>77</sup> Department of Anaesthesiology, University Hospital of Aachen, Aachen, Germany
- <sup>78</sup> Cyclotron Research Center , University of Liège, Liège, Belgium
- <sup>79</sup> Centre for Urgent and Emergency Care Research (CURE), Health Services Research Section, School of Health and Related Research (SchARR), University of Sheffield, Sheffield, UK
- <sup>80</sup> Emergency Department, Salford Royal Hospital, Salford UK
- <sup>81</sup> Institute of Research in Operative Medicine (IFOM), Witten/Herdecke University, Cologne, Germany
- <sup>82</sup> VP Global Project Management CNS, ICON, Paris, France
- <sup>83</sup> Department of Anesthesiology-Intensive Care, Lille University Hospital, Lille, France
- <sup>84</sup> Department of Neurosurgery, Rambam Medical Center, Haifa, Israel
- <sup>85</sup> Department of Anesthesiology & Intensive Care, University Hospitals Southampton NHS Trust, Southampton, UK
- <sup>86</sup> Cologne-Merheim Medical Center (CMMC), Department of Traumatology, Orthopedic Surgery and Sportmedicine, Witten/Herdecke University, Cologne, Germany
- <sup>87</sup> Intensive Care Unit, Southmead Hospital, Bristol, Bristol, UK
- <sup>88</sup> Department of Neurological Surgery, University of California, San Francisco, California, USA
- <sup>89</sup> Department of Anesthesia & Intensive Care, M. Bufalini Hospital, Cesena, Italy
- <sup>90</sup> Department of Neurosurgery, University Hospital Heidelberg, Heidelberg, Germany
- <sup>91</sup> Department of Neurosurgery, The Walton centre NHS Foundation Trust, Liverpool, UK

- <sup>92</sup> Department of Medical Genetics, University of Pécs, Pécs, Hungary
- <sup>93</sup> Department of Neurosurgery, Emergency County Hospital Timisoara , Timisoara, Romania
- <sup>94</sup> School of Medical Sciences, Örebro University, Örebro, Sweden
- <sup>95</sup> Institute for Molecular Medicine Finland, University of Helsinki, Helsinki, Finland
- <sup>96</sup> Analytic and Translational Genetics Unit, Department of Medicine; Psychiatric & Neurodevelopmental Genetics Unit, Department of Psychiatry; Department of Neurology, Massachusetts General Hospital, Boston, MA, USA
- <sup>97</sup> Program in Medical and Population Genetics; The Stanley Center for Psychiatric Research, The Broad Institute of MIT and Harvard, Cambridge, MA, USA
- <sup>98</sup> Department of Radiology, University of Antwerp, Edegem, Belgium
- <sup>99</sup> Department of Anesthesiology & Intensive Care, University Hospital of Grenoble, Grenoble, France
- <sup>100</sup> Department of Anesthesia & Intensive Care, Azienda Ospedaliera Università di Padova, Padova, Italy
- <sup>101</sup> Dept. of Neurosurgery, Leiden University Medical Center, Leiden, The Netherlands and Dept. of Neurosurgery, Medical Center Haaglanden, The Hague, The Netherlands
- <sup>102</sup> Department of Neurosurgery, Helsinki University Central Hospital
- <sup>103</sup> Division of Clinical Neurosciences, Department of Neurosurgery and Turku Brain Injury Centre, Turku University Hospital and University of Turku, Turku, Finland
- <sup>104</sup> Department of Anesthesiology and Critical Care, Pitié -Salpêtrière Teaching Hospital, Assistance Publique, Hôpitaux de Paris and University Pierre et Marie Curie, Paris, France
- <sup>105</sup> Neurotraumatology and Neurosurgery Research Unit (UNINN), Vall d'Hebron Research Institute, Barcelona, Spain
- <sup>106</sup> Department of Neurosurgery, Kaunas University of technology and Vilnius University, Vilnius, Lithuania
- <sup>107</sup> Department of Neurosurgery, Rezekne Hospital, Latvia
- <sup>108</sup> Department of Anaesthesia, Critical Care & Pain Medicine NHS Lothian & University of Edinburgh, Edinburgh, UK
- <sup>109</sup> Director, MRC Biostatistics Unit, Cambridge Institute of Public Health, Cambridge, UK
- <sup>110</sup> Department of Physical Medicine and Rehabilitation, Oslo University Hospital/University of Oslo, Oslo, Norway
- <sup>111</sup> Division of Orthopedics, Oslo University Hospital, Oslo, Norway
- <sup>112</sup> Institute of Clinical Medicine, Faculty of Medicine, University of Oslo, Oslo, Norway
- <sup>113</sup> Broad Institute, Cambridge MA Harvard Medical School, Boston MA, Massachusetts General Hospital, Boston MA, USA
- <sup>114</sup> National Trauma Research Institute, The Alfred Hospital, Monash University, Melbourne, Victoria, Australia
- <sup>115</sup> Department of Neurosurgery, Odense University Hospital, Odense, Denmark
- <sup>116</sup> International Neurotrauma Research Organisation, Vienna, Austria
- <sup>117</sup> Klinik für Neurochirurgie, Klinikum Ludwigsburg, Ludwigsburg, Germany
- <sup>118</sup> Division of Biostatistics and Epidemiology, Department of Preventive Medicine, University of Debrecen, Debrecen, Hungary
- <sup>119</sup> Department Health and Prevention, University Greifswald, Greifswald, Germany
- <sup>120</sup> Department of Anaesthesiology and Intensive Care, AUVA Trauma Hospital, Salzburg, Austria

- <sup>121</sup> Department of Neurology, Elisabeth-TweeSteden Ziekenhuis, Tilburg, the Netherlands
- <sup>122</sup> Department of Neuroanesthesia and Neurointensive Care, Odense University Hospital, Odense, Denmark
- <sup>123</sup> Department of Neuromedicine and Movement Science, Norwegian University of Science and Technology, NTNU, Trondheim, Norway
- <sup>124</sup> Department of Physical Medicine and Rehabilitation, St.Olavs Hospital, Trondheim University Hospital, Trondheim, Norway
- <sup>125</sup> Department of Neurosurgery, University of Pécs, Pécs, Hungary
- <sup>126</sup> Division of Neuroscience Critical Care, John Hopkins University School of Medicine, Baltimore, USA
- <sup>127</sup> Department of Neuropathology, Queen Elizabeth University Hospital and University of Glasgow, Glasgow, UK
- <sup>128</sup> Dept. of Department of Biomedical Data Sciences, Leiden University Medical Center, Leiden, The Netherlands
- <sup>129</sup> Department of Pathophysiology and Transplantation, Milan University, and Neuroscience ICU, Fondazione IRCCS Cà Granda Ospedale Maggiore Policlinico, Milano, Italy
- <sup>130</sup> Department of Radiation Sciences, Biomedical Engineering, Umeå University, Umeå, Sweden
- <sup>131</sup> Perioperative Services, Intensive Care Medicine and Pain Management, Turku University Hospital and University of Turku, Turku, Finland
- <sup>132</sup> Department of Neurosurgery, Kaunas University of Health Sciences, Kaunas, Lithuania
- <sup>133</sup> Intensive Care and Department of Pediatric Surgery, Erasmus Medical Center, Sophia Children's Hospital, Rotterdam, The Netherlands
- <sup>134</sup> Department of Neurosurgery, Kings college London, London, UK
- <sup>135</sup> Neurologie, Neurochirurgie und Psychiatrie, Charité – Universitätsmedizin Berlin, Berlin, Germany
- <sup>136</sup> Department of Intensive Care Adults, Erasmus MC– University Medical Center Rotterdam, Rotterdam, the Netherlands
- <sup>137</sup> icoMetrix NV, Leuven, Belgium
- <sup>138</sup> Movement Science Group, Faculty of Health and Life Sciences, Oxford Brookes University, Oxford, UK
- <sup>139</sup> Psychology Department, Antwerp University Hospital, Edegem, Belgium
- <sup>140</sup> Director of Neurocritical Care, University of California, Los Angeles, USA
- <sup>141</sup> Department of Neurosurgery, St.Olavs Hospital, Trondheim University Hospital, Trondheim, Norway
- <sup>142</sup> Department of Emergency Medicine, University of Florida, Gainesville, Florida, USA
- <sup>143</sup> Department of Neurosurgery, Charité – Universitätsmedizin Berlin, corporate member of Freie Universität Berlin, Humboldt-Universität zu Berlin, and Berlin Institute of Health, Berlin, Germany
- <sup>144</sup> VTT Technical Research Centre, Tampere, Finland
- <sup>145</sup> Section of Neurosurgery, Department of Surgery, Rady Faculty of Health Sciences, University of Manitoba, Winnipeg, MB, Canada

|                |             |                                        |
|----------------|-------------|----------------------------------------|
| Åkerlund       | Cecilia     | cecilia.ai.akerlund@gmail.com          |
| Amrein         | Krisztina   | tina.amrein84@gmail.com                |
| Andelic        | Nada        | NADAND@ous-hf.no                       |
| Andreassen     | Lasse       | Lasse.Andreassen@unn.no                |
| Anke           | Audny       | Audny.anke@unn.no                      |
| Antoni         | Anna        | anna.antoni@meduniwien.ac.at           |
| Audibert       | Gérard      | g.audibert@chu-nancy.fr                |
| Azouvi         | Philippe    | philippe.azouvi@rpc.aphp.fr            |
| Azzolini       | Maria Luisa | azzolini.marialuisa@hsr.it             |
| Bartels        | Ronald      | Ronald.Bartels@radboudumc.nl           |
| Barzó          | Pál         | pbarzo@gmail.com                       |
| Beauvais       | Romuald     | beauvais@arttic.eu                     |
| Beer           | Ronny       | ronny.beer@i-med.ac.at                 |
| Bellander      | Bo-Michael  | bo-michael.bellander@karolinska.se     |
| Belli          | Antonio     | a.belli@bham.ac.uk                     |
| Benali         | Habib       | habib.benali@gmail.com                 |
| Berardino      | Maurizio    | maurizio_berardino@fastwebnet.it       |
| Beretta        | Luigi       | beretta.luigi@hsr.it                   |
| Blaabjerg      | Morten      | morten.blaabjerg1@rsyd.dk              |
| Bragge         | Peter       | peter.bragge@monash.edu                |
| Brazinova      | Alexandra   | alexandra.brazinova@gmail.com          |
| Brinck         | Vibeke      | vibeke.brinck@quesgen.com              |
| Brooker        | Joanne      | Joanne.Brooker@monash.edu              |
| Brorsson       | Camilla     | Camilla.Brorsson@umu.se                |
| Buki           | Andras      | 2saturn@gmail.com                      |
| Bullinger      | Monika      | bullinger@uke.de                       |
| Cabeleira      | Manuel      | mc916@cam.ac.uk                        |
| Caccioppola    | Alessio     | alessio.caccioppola@gmail.com          |
| Calappi        | Emiliana    | calemy02@yahoo.it                      |
| Calvi          | Maria Rosa  | calvi.mariarosa@hsr.it                 |
| Cameron        | Peter       | peter.cameron@med.monash.edu.au        |
| Carbayo Lozano | Guillermo   | guillermobilbo@gmail.com               |
| Carbonara      | Marco       | marco.carbonara@gmail.com              |
| Castañón-León  | Ana M.      | ana.maria.castano.leon@gmail.com       |
| Cavallo        | Simona      | cavallosimona1@gmail.com               |
| Chevallard     | Giorgio     | giorgio.chevallard@ospedaleniguarda.it |
| Chierigato     | Arturo      | arturo.chierigato@ospedaleniguarda.it  |
| Citerio        | Giuseppe    | giuseppe.citerio@unimib.it             |
| Clusmann       | Hans        | hclusmann@ukaachen.de                  |
| Coburn         | Mark Steven | mark.coburn@ukbonn.de                  |
| Coles          | Jonathan    | jpc44@wbic.cam.ac.uk                   |
| Cooper         | Jamie D.    | jamie.cooper@monash.edu                |
| Correia        | Marta       | Marta.Correia@mrc-cbu.cam.ac.uk        |



|                 |            |                                   |
|-----------------|------------|-----------------------------------|
| Čović           | Amra       | amra.covic@med.uni-goettingen.de  |
| Curry           | Nicola     | nicola.curry@ouh.nhs.uk           |
| Czeiter         | Endre      | endre.czeiter@gmail.com           |
| Czosnyka        | Marek      | mc141@medschl.cam.ac.uk           |
| Dahyot-Fizelier | Claire     | c.dahyot-fizelier@chu-poitiers.fr |
| Dark            | Paul       | paul.m.dark@manchester.ac.uk      |
| Dawes           | Helen      | hdawes@brookes.ac.uk              |
| De Keyser       | Véronique  | veronique.dekeyser@uza.be         |
| Degos           | Vincent    | vincent.degos@aphp.fr             |
| Della Corte     | Francesco  | dellacorte.f@gmail.com            |
| den Boogert     | Hugo       | Hugo.denBoogert@radboudumc.nl     |
| Depreitere      | Bart       | bart.depreitere@uzleuven.be       |
| Đilvesi         | Đula       | djuladjilvesi@gmail.com           |
| Dixit           | Abhishek   | ad825@cam.ac.uk                   |
| Donoghue        | Emma       | emma.donoghue@monash.edu          |
| Dreier          | Jens       | jens.dreier@charite.de            |
| Dulière         | Guy-Loup   | glduliere@gmail.com               |
| Ercole          | Ari        | ae105@cam.ac.uk                   |
| Esser           | Patrick    | pesser@brookes.ac.uk              |
| Ezer            | Erzsébet   | ezererzsebet@yahoo.com            |
| Fabricius       | Martin     | fabricius@dadlnet.dk              |
| Feigin          | Valery L.  | valery.feigin@aut.ac.nz           |
| Foks            | Kelly      | k.foks@erasmusmc.nl               |
| Frisvold        | Shirin     | Shirin.Kordasti@unn.no            |
| Furmanov        | Alex       | alexpuil@yahoo.com                |
| Gagliardo       | Pablo      | pablog@fivan.org                  |
| Galanaud        | Damien     | galanaud@gmail.com                |
| Gantner         | Dashiell   | dashiell.gantner@monash.edu       |
| Gao             | Guoyi      | gao3@sina.com                     |
| George          | Pradeep    | george@incf.org                   |
| Ghuysen         | Alexandre  | A.Ghuysen@chu.ulg.ac.be           |
| Giga            | Lelde      | lelde.giga@inbox.lv               |
| Glocker         | Ben        | b.glocker@imperial.ac.uk          |
| Golubović       | Jagoš      | jagosgolubovic@gmail.com          |
| Gomez           | Pedro A.   | pagolopez@gmail.com               |
| Gratz           | Johannes   | johannes.gratz@meduniwien.ac.at   |
| Gravesteijn     | Benjamin   | b.gravesteijn@erasmusmc.nl        |
| Grossi          | Francesca  | francesca.grossi@libero.it        |
| Gruen           | Russell L. | russell.gruen@anu.edu.au          |
| Gupta           | Deepak     | drdeepakgupta@gmail.com           |
| Haagsma         | Juanita A. | j.haagsma@erasmusmc.nl            |
| Haitsma         | Iain       | i.haitsma@erasmusmc.nl            |
| Helbok          | Raimund    | Raimund.Helbok@tirol-kliniken.at  |

|               |             |                                          |
|---------------|-------------|------------------------------------------|
| Helseth       | Eirik       | EHELSETH@ous-hf.no                       |
| Horton        | Lindsay     | lindsay.horton@stir.ac.uk                |
| Huijben       | Jilske      | j.a.huijben@erasmusmc.nl                 |
| Hutchinson    | Peter J.    | pjah2@cam.ac.uk                          |
| Jacobs        | Bram        | b.jacobs@umcg.nl                         |
| Jankowski     | Stefan      | Stefan.Jankowski@sth.nhs.uk              |
| Jarrett       | Mike        | mike.jarrett@quesgen.com                 |
| Jiang         | Ji-yao      | jiyaojiang@126.com                       |
| Johnson       | Faye        | faye.johnson@live.co.uk                  |
| Jones         | Kelly       | kejones@aut.ac.nz                        |
| Karan         | Mladen      | mladjokaran@gmail.com                    |
| Kolias        | Angelos G.  | angeloskolias@gmail.com                  |
| Kompanje      | Erwin       | erwinkompanje@me.com                     |
| Kondziella    | Daniel      | Daniel.Kondziella@regionh.dk             |
| Kornaropoulos | Evgenios    | ek481@cam.ac.uk                          |
| Koskinen      | Lars-Owe    | Lars-Owe.Koskinen@umu.se                 |
| Kovács        | Noémi       | kovacs.noemi@pte.hu                      |
| Lagares       | Alfonso     | algadoc@yahoo.com                        |
| Lanyon        | Linda       | lindal@incf.org                          |
| Laureys       | Steven      | steven.laureys@ulg.ac.be                 |
| Lecky         | Fiona       | f.e.lecky@sheffield.ac.uk                |
| Ledoux        | Didier      | dledoux@chu.ulg.ac.be                    |
| Lefering      | Rolf        | Rolf.Lefering@uni-wh.de                  |
| Legrand       | Valerie     | Valerie.Legrand@iconplc.com              |
| Lejeune       | Aurelie     | aurelie.lejeune@chru-lille.fr            |
| Levi          | Leon        | llevi@rambam.health.gov.il               |
| Lightfoot     | Roger       | Roger.Lightfoot@uhs.nhs.uk               |
| Lingsma       | Hester      | h.lingsma@erasmusmc.nl                   |
| Maas          | Andrew I.R. | andrew.maas@uza.be                       |
| Maegele       | Marc        | Marc.Maegele@t-online.de                 |
| Majdan        | Marek       | mmajdan@truni.sk                         |
| Manara        | Alex        | Alex.Manara@nbt.nhs.uk                   |
| Manley        | Geoffrey    | ManleyG@ucsf.edu                         |
| Maréchal      | Hugues      | Hugues.Marechal@chrcitadelle.be          |
| Martino       | Costanza    | costmartino74@gmail.com                  |
| Mattern       | Julia       | Julia.Mattern@med.uni-heidelberg.de      |
| McMahon       | Catherine   | Catherine.McMahon@thewaltoncentre.nhs.uk |
| Melegh        | Béla        | bela.melegh@aok.pte.hu                   |
| Menon         | David       | dkm13@cam.ac.uk                          |
| Menovsky      | Tomas       | tomas.menovsky@uza.be                    |
| Mikolic       | Ana         | a.mikolic@erasmusmc.nl                   |
| Misset        | Benoit      | Benoit.Misset@chuliege.be                |
| Muraleedharan | Visakh      | visakh@incf.org                          |

|                    |               |                                     |
|--------------------|---------------|-------------------------------------|
| Murray             | Lynnette      | lynnette.murray@monash.edu          |
| Nair               | Nandesh       | nandesh.nair@uza.be                 |
| Negru              | Ancuta        | negruancu@gmail.com                 |
| Nelson             | David         | david.nelson@karolinska.se          |
| Newcombe           | Virginia      | vfjn2@cam.ac.uk                     |
| Nieboer            | Daan          | d.nieboer@erasmusmc.nl              |
| Nyirádi            | József        | nyiradi.jozsef@pte.hu               |
| Oresic             | Matej         | matej.oresic@oru.se                 |
| Ortolano           | Fabrizio      | lupeda@gmail.com                    |
| Otesile            | Olubukola     | o.otesile@sheffield.ac.uk           |
| Palotie            | Aarno         | aarno.palotie@helsinki.fi           |
| Parizel            | Paul M.       | paul.parizel@uantwerpen.be          |
| Payen              | Jean-François | Jean-Francois.Payen@ujf-grenoble.fr |
| Perera             | Natascha      | perera@arttic.eu                    |
| Perlberg           | Vincent       | vincent.perlberg@gmail.com          |
| Persona            | Paolo         | ppersona75@gmail.com                |
| Peul               | Wilco         | W.C.Peul@lumc.nl                    |
| Piippo-Karjalainen | Anna          | anna.piippo@hus.fi                  |
| Pirinen            | Matti         | matti.pirinen@helsinki.fi           |
| Ples               | Horia         | horia.ples@neuromed.ro              |
| Polinder           | Suzanne       | s.polinder@erasmusmc.nl             |
| Pomposo            | Inigo         | inigo.pomposo@osakidetza.net        |
| Posti              | Jussi P.      | jussi.posti@tyks.fi                 |
| Puybasset          | Louis         | louis.puybasset@aphp.fr             |
| Rădoi              | Andreea       | aradoi@neurotrauma.net              |
| Ragauskas          | Arminas       | telematics@ktu.lt                   |
| Raj                | Rahul         | rahul.raj@hus.fi                    |
| Rambadagalla       | Malinka       | malinka.rambadagalla@gmail.com      |
| Rehorčíková        | Veronika      | rehorcikova@gmail.com               |
| Rhodes             | Jonathan      | jrhodes1@staffmail.ed.ac.uk         |
| Richardson         | Sylvia        | sylvia.richardson@mrc-bsu.cam.ac.uk |
| Richter            | Sophie        | sr773@cam.ac.uk                     |
| Ripatti            | Samuli        | samuli.ripatti@helsinki.fi          |
| Rocka              | Saulius       | saulius.rocka@mf.vu.lt              |
| Roe                | Cecilie       | e.c.t.roe@medisin.uio.no            |
| Roise              | Olav          | olav.roise@medisin.uio.no           |
| Rosand             | Jonathan      | jrosand@partners.org                |
| Rosenfeld          | Jeffrey       | J.Rosenfeld@alfred.org.au           |
| Rosenlund          | Christina     | chrisstenrose@gmail.com             |
| Rosenthal          | Guy           | rosenthalg@hadassah.org.il          |
| Rossaint           | Rolf          | RRossaint@ukaachen.de               |
| Rossi              | Sandra        | sandrarossi0@gmail.com              |
| Rueckert           | Daniel        | d.rueckert@imperial.ac.uk           |

|                |                |                                          |
|----------------|----------------|------------------------------------------|
| Rusnák         | Martin         | mrusnak@igeh.org                         |
| Sahuquillo     | Juan           | sahuquillo@neurotrauma.net               |
| Sakowitz       | Oliver         | oliver.sakowitz@gmail.com                |
| Sanchez-Porras | Renan          | renan_md@hotmail.com                     |
| Sandor         | Janos          | sandor.janos@sph.unideb.hu               |
| Schäfer        | Nadine         | Nadine.Schaefer@uni-wh.de                |
| Schmidt        | Silke          | silke.schmidt@uni-greifswald.de          |
| Schoechl       | Herbert        | Herbert.Schoechl@auva.at                 |
| Schoonman      | Guus           | g.schoonman@tsz.nl                       |
| Schou          | Rico Frederik  | rico@mymedic.dk                          |
| Schwendenwein  | Elisabeth      | elisabeth.schwendenwein@meduniwien.ac.at |
| Sewalt         | Charlie        | c.sewalt@erasmusmc.nl                    |
| Skandsen       | Toril          | toril.skandsen@ntnu.no                   |
| Smielewski     | Peter          | ps10011@cam.ac.uk                        |
| Sorinola       | Abayomi        | sorinola_abayomi@hotmail.com             |
| Stamatakis     | Emmanuel       | eas46@cam.ac.uk                          |
| Stanworth      | Simon          | simon.stanworth@nhsbt.nhs.uk             |
| Kowark         | Ana            | akowark@ukaachen.de                      |
| Stevens        | Robert         | rstevens@jhmi.edu                        |
| Stewart        | William        | william.stewart@glasgow.ac.uk            |
| Steyerberg     | Ewout W.       | e.steyerberg@erasmusmc.nl                |
| Stocchetti     | Nino           | stocchet@policlinico.mi.it               |
| Sundström      | Nina           | Nina.Sundstrom@vll.se                    |
| Takala         | Riikka         | riikka.takala@tyks.fi                    |
| Tamás          | Viktória       | tamas.viktoria@pte.hu                    |
| Tamosuitis     | Tomas          | tomas.tamosuitis@kaunoklinikos.lt        |
| Taylor         | Mark Steven    | marktrnava@gmail.com                     |
| Te Ao          | Braden         | braden.teao@aut.ac.nz                    |
| Tenovuo        | Olli           | olli.tenovuo@tyks.fi                     |
| Theadom        | Alice          | alice.theadom@aut.ac.nz                  |
| Thomas         | Matt           | Matt.Thomas@nbt.nhs.uk                   |
| Tibboel        | Dick           | d.tibboel@erasmusmc.nl                   |
| Timmers        | Marjolijn      | mtimmers@hotmail.com                     |
| Tolias         | Christos       | christos.tolias@nhs.net                  |
| Trapani        | Tony           | tony.trapani@monash.edu                  |
| Tudora         | Cristina Maria | cristina.tudora@neuromed.ro              |
| Unterberg      | Andreas        | Andreas.Unterberg@med.uni-heidelberg.de  |
| Vajkoczy       | Peter          | Peter.Vajkoczy@charite.de                |
| Valeinis       | Egils          | Egils.Valeinis@latnet.lv                 |
| Vallance       | Shirley        | S.Vallance@alfred.org.au                 |
| Vámos          | Zoltán         | azozoka@gmail.com                        |
| Van der Jagt   | Mathieu        | m.vanderjagt@erasmusmc.nl                |
| van der Naalt  | Joukje         | j.van.der.naalt@umcg.nl                  |

|                 |               |                                             |
|-----------------|---------------|---------------------------------------------|
| Van der Steen   | Gregory       | gregory@webstone.be                         |
| van Dijck       | Jeroen T.J.M. | j.van.dijck@haaglandenmc.nl                 |
| van Essen       | Thomas A.     | T.A.van_Essen@lumc.nl                       |
| Van Hecke       | Wim           | wim.vanhecke@icomatrix.com                  |
| van Heugten     | Caroline      | Caroline.vanheugten@maastrichtuniversity.nl |
| Van Praag       | Dominique     | dominique.vanpraag@uza.be                   |
| van Wijk        | Roel          | roel-van-wijk@ziggo.nl                      |
| Vande Vyvere    | Thijs         | thijs.vandevyvere@icomatrix.com             |
| Vargiolu        | Alessia       | neuroranimazione@hsgerardo.org              |
| Vega            | Emmanuel      | emmanuel.vega@chru-lille.fr                 |
| Velt            | Kimberley     | k.velt@erasmusmc.nl                         |
| Verheyden       | Jan           | jan.verheyden@icomatrix.com                 |
| Vespa           | Paul M.       | PVespa@mednet.ucla.edu                      |
| Vik             | Anne          | anne.vik@ntnu.no                            |
| Vilcinis        | Rimantas      | rimantas.vilcinis@kaunoklinikos.lt          |
| Volovici        | Victor        | v.volovici@erasmusmc.nl                     |
| von Steinbüchel | Nicole        | nvsteinbuechel@med.uni-goettingen.de        |
| Voormolen       | Daphne        | d.voormolen@erasmusmc.nl                    |
| Vulekovic       | Petar         | pvulekovic@gmail.com                        |
| Wang            | Kevin K.W.    | kawangwang17@gmail.com                      |
| Wiegers         | Eveline       | e.wiegers@erasmusmc.nl                      |
| Williams        | Guy           | gbw1000@wbic.cam.ac.uk                      |
| Wilson          | Lindsay       | l.wilson@stir.ac.uk                         |
| Winzeck         | Stefan        | sw742@cam.ac.uk                             |
| Wolf            | Stefan        | stefan.wolf@charite.de                      |
| Yang            | Zhihui        | zhihuiyang@ufl.edu                          |
| Ylén            | Peter         | peter.ylen@vtt.fi                           |
| Younsi          | Alexander     | alexander.younsi@med.uni-heidelberg.de      |
| Zeiler          | Frederick A.  | umzeiler@myumanitoba.ca                     |
| Ziverte         | Agate         | agate.ziverte@inbox.lv                      |
| Zoerle          | Tommaso       | tommaso.zoerle@policlinico.mi.it            |
